# Supplementary material
Source: PubMed Central journal article supplement (PMC10186210)
Supplement: jamaneurol-e231184-s002.pdf [file jamaneurol-e231184-s002.pdf]

## Supplemental Online Content

Kalincik T, Sharmin S, Roos I, et al; MSBase Study Group Authors; MSBase Study Group Collaborators. Comparative Effectiveness of autologous hematopoietic stem cell transplant vs fingolimod, natalizumab, and ocrelizumab in highly active relapsing-remitting multiple sclerosis. *JAMA Neurol*. Published online May 15, 2023. doi:10.1001/jamaneurol.2023.1184

**eTable 1.** Data quality procedure

**eTable 2.** Summary of the study protocol (target trial)

**eTable 3.** Patient disposition per centre

**eTable 4.** Characteristics of the included unmatched patients at baseline

**eTable 5.** Logistic regression models used to estimate the propensity scores

**eTable 6.** Power analysis

**eTable 7.** Serious adverse events reported after AHSCT

This supplemental material has been provided by the authors to give readers additional information about their work.

**eTable 1****Data quality procedure**

- Duplicate patient records were removed.
- Centres with <10 patient records were excluded.
- Patients with missing date of birth were excluded.
- MS onset dates after the MSBase data extract date were removed.
- Patients with missing date of the first clinical presentation of MS were excluded.
- The dates of MS onset and the first recorded MS course were aligned.
- Patients with the age at onset outside the 0-100 range were excluded.
- A logical sequence of the MS courses (e.g. clinically isolated syndrome, relapsing-remitting MS, secondary progressive MS) was assured.
- Entries with the initiation of progressive MS prior to its clinical onset of MS were excluded.
- Visits with missing visit date or the recorded date before the clinical MS onset or after the date of MSBase data extract were removed.
- EDSS scores outside the range of possible EDSS values were removed.
- Duplicate visits were merged.
- MS relapses with missing visit date or the recorded date after the date of MSBase data extract were removed.
- Duplicate MS relapses were merged.
- Relapses occurring within 30 days of each other were merged.
- Visits preceded by relapses were identified and time from the last relapse was calculated for each visit.
- Therapies were labelled as discontinued or continuing.
- Therapies with erroneous date entries were removed (e.g. commencement date > termination date, commencement after the MSBase data extract date, commencement of disease modifying therapy before the year 1980).
- MS disease modifying therapies were identified and labelled.
- Duplicate treatment entries were removed.
- Where multiple disease modifying therapies were recorded simultaneously, treatment end date of the previous therapy was imputed as the commencement date of the following therapy.
- Consecutive entries for certain disease modifying therapies were merged into a continuous treatment entry, given that the gap between the entries did not exceed 190 days for mitoxantrone, 365 days for cladribine, 90 days for other disease modifying therapies.
- The default duration of treatment effect was recorded as 190 days (mitoxantrone), 5 years (alemtuzumab) or 365 days (cladribine) from treatment commencement.

**eTable 2**  
**Summary of the study protocol (target trial)**

| <b>Protocol component</b>   | <b>Description</b>                                                                                                                                                                                                                                                                                                                                                         |
|-----------------------------|----------------------------------------------------------------------------------------------------------------------------------------------------------------------------------------------------------------------------------------------------------------------------------------------------------------------------------------------------------------------------|
| inclusion criteria          | relapsing-remitting multiple sclerosis or clinically isolated syndrome                                                                                                                                                                                                                                                                                                     |
| treatment strategies        | AHSCT or fingolimod or ocrelizumab or natalizumab<br>(secondary analysis: B-cell depleting therapies ocrelizumab and rituximab)                                                                                                                                                                                                                                            |
| assignment procedures       | non-random assignation of therapy by treating neurologists<br>propensity score matching (1:10 variable matching ratio) with pairwise censoring                                                                                                                                                                                                                             |
| follow-up period            | treatment persistence $\geq 3$ months, $\geq 2$ disability scores with $\geq 1$ score recorded while on study therapy                                                                                                                                                                                                                                                      |
| outcomes                    | primary: annualised relapse rate<br>secondary:<br>cumulative hazard of relapses<br>patients free from relapses<br>cumulative hazard of 6-month confirmed disability worsening<br>patients free from 6-month confirmed disability worsening<br>cumulative hazard of 6-month confirmed disability improvement<br>patients free from 6-month confirmed disability improvement |
| causal contrast of interest | per-protocol effect                                                                                                                                                                                                                                                                                                                                                        |
| analysis                    | weighted negative binomial model with cluster effect for matched patient pairs and adjusted for visit frequency<br>weighted proportional hazards models of single event or multiple events (with robust estimation of variance)                                                                                                                                            |

**eTable 3**  
**Patient disposition per centre**

| <b>Centre</b>                                                                                    | <b>Patients</b> |
|--------------------------------------------------------------------------------------------------|-----------------|
| Ottawa Hospital Research Institute, Ottawa, Canada                                               | 36              |
| Sheffield Teaching Hospitals, Sheffield, UK                                                      | 35              |
| Uppsala University Hospital, Uppsala, Sweden                                                     | 26              |
| St Vincent's Hospital Sydney, Sydney, Australia                                                  | 25              |
| Charles University in Prague and General University Hospital, Prague, Czech Republic             | 430             |
| Austin Health, Melbourne, Australia                                                              | 70              |
| The Royal Melbourne Hospital Neuroimmunology Centre, Melbourne, Australia                        | 183             |
| The Alfred Hospital, Melbourne, Australia                                                        | 143             |
| University of Queensland, Brisbane, Australia                                                    | 52              |
| Rehabilitation and MS-Centre Overpelt and Hasselt University, Hasselt, Belgium                   | 51              |
| Box Hill Hospital, Melbourne, Australia                                                          | 204             |
| University Newcastle, Newcastle, Australia                                                       | 77              |
| Antwerp University Hospital, Edegem, Belgium                                                     | 25              |
| Brain and Mind Centre, Sydney, Australia                                                         | 51              |
| Azienda Sanitaria Unica Regionale Marche - AV3, Macerata, Italy                                  | 26              |
| Ospedali Riuniti di Salerno, Salerno, Italy                                                      | 13              |
| Royal Brisbane and Women's Hospital, Brisbane, Australia                                         | 8               |
| Dokuz Eylul University, Konak/Izmir, Turkey                                                      | 346             |
| Amiri Hospital, Sharq, Kuwait                                                                    | 243             |
| Hospital Universitario Virgen Macarena, Sevilla, Spain                                           | 214             |
| KTU Medical Faculty Farabi Hospital, Trabzon, Turkey                                             | 177             |
| University Hospital and University of Basel, Basel, Switzerland                                  | 170             |
| GF Ingrassia, Catania, Italy                                                                     | 146             |
| 19 Mayıs University, Samsun, Turkey                                                              | 129             |
| CHUM MS Center and Universite de Montreal, Montreal, Canada                                      | 117             |
| CISSS Chaudière-Appalache, Levis, Canada                                                         | 106             |
| University G. d'Annunzio, Chieti, Italy                                                          | 106             |
| American University of Beirut Medical Center, Beirut, Lebanon                                    | 73              |
| Bakirkoy Education & Research Hospital for Psychiatric & Neurological Diseases, Istanbul, Turkey | 71              |
| Flinders University, Adelaide, Australia                                                         | 70              |
| CSSS Saint-Jérôme, Saint-Jerome, Canada                                                          | 69              |
| Haydarpasa Numune Training and Research Hospital, Istanbul, Turkey                               | 56              |
| Liverpool Hospital, Sydney, Australia                                                            | 49              |
| Monash Medical Centre, Melbourne, Australia                                                      | 48              |
| Neuro Rive-Sud, Quebec, Canada                                                                   | 47              |
| Isfahan University of Medical Sciences, Isfahan, Iran                                            | 47              |
| Garibaldi Hospital, Catania, Italy                                                               | 47              |
| Centro Hospitalar Universitario de Sao Joao, Porto, Portugal                                     | 46              |
| Cliniques Universitaires Saint-Luc, Brussels, Belgium                                            | 44              |
| Zuyderland Medical Center, Sittard-Geleen, Netherlands                                           | 41              |
| Universitary Hospital Ghent, Ghent, Belgium                                                      | 40              |
| Hacettepe University, Ankara, Turkey                                                             | 40              |
| Hospital Germans Trias i Pujol, Badalona, Spain                                                  | 38              |
| Azienda Ospedaliera di Rilievo Nazionale San Giuseppe Moscati Avellino, Avellino, Italy          | 37              |
| University of Debrecen, Debrecen, Hungary                                                        | 36              |
| University of Florence, Florence, Italy                                                          | 32              |
| ASL3 Genovese, Genova, Italy                                                                     | 31              |
| Razi Hospital, Manouba, Tunisia                                                                  | 31              |
| Hospital Universitario Donostia, San Sebastián, Spain                                            | 28              |
| Westmead Hospital, Sydney, Australia                                                             | 25              |
| Hospital de Galdakao-Usansolo, Galdakao, Spain                                                   | 25              |
| University Hospital Reina Sofia, Cordoba, Spain                                                  | 25              |
| Hospital Clinic de Barcelona, Barcelona, Spain                                                   | 24              |
| Sultan Qaboos University Hospital, Al-Khodh, Oman                                                | 24              |
| Buffalo General Medical Center, Buffalo, United States                                           | 21              |
| Royal Hobart Hospital, Hobart, Australia                                                         | 20              |
| Universidade Metropolitana de Santos, Santos, Brazil                                             | 20              |
| Hospital Universitario Virgen de Valme, Seville, Spain                                           | 18              |

|                                                                                |    |
|--------------------------------------------------------------------------------|----|
| Groene Hart Ziekenhuis, Gouda, Netherlands                                     | 18 |
| University of Western Australia, Nedlands, Australia                           | 16 |
| Ospedale Civico Lugano, Lugano, Switzerland                                    | 16 |
| Aarhus University Hospital, Aarhus C, Denmark                                  | 14 |
| Jahn Ferenc Teaching Hospital, Budapest, Hungary                               | 13 |
| Geneva University Hospital, Geneva, Switzerland                                | 12 |
| Hospital Universitari MútuaTerrassa, Barcelona, Spain                          | 11 |
| Nemocnice Jihlava, Jihlava, Czech Republic                                     | 10 |
| Hospital Clinico San Carlos, Madrid, Spain                                     | 9  |
| Centro Hospitalar Universitario de Sao Joao, Porto, Portugal                   | 9  |
| Jewish General Hospital, Montreal, Canada                                      | 8  |
| Semmelweis University Budapest, Budapest, Hungary                              | 8  |
| University Hospital Nijmegen, Nijmegen, Netherlands                            | 8  |
| Szent Imre Hospital, Budapest, Hungary                                         | 7  |
| King Fahad Specialist Hospital-Dammam, Khobar, Saudi Arabia                    | 7  |
| University of Szeged, Szeged, Hungary                                          | 6  |
| Hospital Universitario de la Ribera, Alzira, Spain                             | 5  |
| South Eastern HSC Trust, Belfast, United Kingdom                               | 5  |
| Townsville Hospital, Townsville, Australia                                     | 4  |
| St. Michael's Hospital, Toronto, Canada                                        | 4  |
| AHEPA University Hospital, Thessaloniki, Greece                                | 4  |
| Veszprém Megyei Csolnoky Ferenc Kórház zrt., Veszprem, Hungary                 | 4  |
| Royal Hospital, Muscat, Oman                                                   | 4  |
| INEBA - Institute of Neuroscience Buenos Aires, Buenos Aires, Argentina        | 3  |
| Geelong Hospital, Geelong, Australia                                           | 3  |
| AZ Alma Ziekenhuis, Sijsele - Damme, Belgium                                   | 3  |
| Hospital General Universitario de Alicante, Alicante, Spain                    | 3  |
| Péterfy Sandor Hospital, Budapest, Hungary                                     | 3  |
| Christchurch Hospital, Christchurch, New Zealand                               | 3  |
| Koc University, Istanbul, Turkey                                               | 3  |
| Centro de Esclerosis Múltiple de Buenos Aires (CEMBA), Buenos Aires, Argentina | 2  |
| Sanatorio Allende, Cordoba, Argentina                                          | 2  |
| St Vincents Hospital, Fitzroy, Melbourne, Australia                            | 2  |
| Concord Repatriation General Hospital, Sydney, Australia                       | 2  |
| AU-043, Australia                                                              | 2  |
| Royal Victoria Hospital, Belfast, United Kingdom                               | 2  |
| BAZ County Hospital, Miskolc, Hungary                                          | 2  |
| St Vincent's University Hospital, Dublin, Ireland                              | 2  |
| Hospital Fernandez, Capital Federal, Argentina                                 | 1  |
| Macquarie University Hospital, Sydney, Australia                               | 1  |
| Waikato Hospital, Hamilton, New Zealand                                        | 1  |
| Emergency Clinical County Hospital \Pius Brinzeu\"                             | 1  |
| New York University Langone Medical Center, New York, United States            | 1  |

**eTable 4**  
**Characteristics of the included unmatched patients at baseline**

|                                           | <b>AHSCT</b> | <b>fingolimod</b> | <b>ocrelizumab</b> | <b>natalizumab</b> |
|-------------------------------------------|--------------|-------------------|--------------------|--------------------|
| patients included                         | 167          | 2558              | 700                | 1490               |
| sex, M (%)                                | 54 (32.3)    | 714 (27.9)        | 232 (33.1)         | 398 (26.7)         |
| age (mean (SD))                           | 35.0 (8.8)   | 38.4 (10.0)       | 41.8 (11.2)        | 36.8 (9.8)         |
| MS duration, y (mean (SD))                | 7.88 (5.43)  | 9.56 (7.17)       | 10.89 (7.79)       | 8.74 (6.92)        |
| relapses in prior 12 months (mean (SD))   | 0.77 (0.99)  | 0.75 (0.84)       | 0.52 (0.76)        | 1.26 (1.06)        |
| relapses in prior 24 months (mean (SD))   | 1.07 (1.29)  | 1.17 (1.17)       | 0.87 (1.07)        | 1.93 (1.49)        |
| baseline EDSS (mean (SD))                 | 4.01 (1.73)  | 2.35 (1.61)       | 3.03 (1.89)        | 2.91 (1.75)        |
| top pre-baseline DMT (%)                  |              |                   |                    |                    |
| low-efficacy                              | 23(13.8)     | 991 (38.7)        | 120 (17.1)         | 603 (40.5)         |
| medium-efficacy                           | 12 (7.2)     | 63 (2.5)          | 176 (25.1)         | 156 (10.5)         |
| high-efficacy                             | 24 (14.4)    | 303 (11.8)        | 174 (24.9)         | 31 (2.1)           |
| unknown                                   | 108 (64.7)   | 1201 (47.0)       | 230 (32.9)         | 700 (47.0)         |
| Postbaseline follow-up, years (mean (SD)) | 4.07 (2.61)  | 2.80 (2.24)       | 1.64 (0.98)        | 2.50 (2.14)        |
| region (%)                                |              |                   |                    |                    |
| Europe                                    | 82 (49.1)    | 1017 (39.8)       | 132 (18.9)         | 777 (52.1)         |
| Middle East and Africa                    | 0 (0.0)      | 826 (32.3)        | 228 (32.6)         | 219 (14.7)         |
| North America                             | 35 (21.0)    | 240 (9.4)         | 58 (8.3)           | 108 (7.2)          |
| Asia-Pacific                              | 50 (29.9)    | 461 (18.0)        | 282 (40.3)         | 371 (24.9)         |
| South America                             | 0 (0.0)      | 14 (0.5)          | 0 (0.0)            | 15 (1.0)           |
| visit interval, months (mean (SD))        | 2.6 (6.0)    | 6.6 (9.8)         | 3.6 (3.5)          | 10.7 (17.3)        |

SD, standard deviation; DMT, disease modifying therapy

low-efficacy therapies: interferons  $\beta$ , glatiramer acetate, teriflunomide

medium-efficacy therapies: dimethyl fumarate, fingolimod, daclizumab, cladribine

high-efficacy therapies: natalizumab, alemtuzumab, ocrelizumab, rituximab, mitoxantrone

**eTable 5**  
**Logistic regression models used to estimate the propensity scores**

**AHSCT (reference) vs. fingolimod**

|                                                             | Coefficient | Std. Error | t       | Pr(> t )     |
|-------------------------------------------------------------|-------------|------------|---------|--------------|
| (Intercept)                                                 | 0.43067     | 0.40870    | 1.054   | 0.29209      |
| sex [male]                                                  | -0.08138    | 0.16631    | -0.489  | 0.62466      |
| age                                                         | 0.09619     | 0.01010    | 9.522   | < 2e-16 ***  |
| baseline disability, EDSS                                   | -0.76257    | 0.05124    | -14.883 | < 2e-16 ***  |
| relapses, previous 12 months                                | -0.25996    | 0.15271    | -1.702  | 0.08881 .    |
| relapses, previous 24 months                                | 0.32227     | 0.11905    | 2.707   | 0.00683 **   |
| disease duration                                            | 0.04752     | 0.01475    | 3.223   | 0.00129 **   |
| the most active previous therapy (reference: high-efficacy) |             |            |         |              |
| low-efficacy                                                | 0.60609     | 0.29305    | 2.068   | 0.03871 *    |
| medium-efficacy                                             | -1.06055    | 0.38149    | -2.780  | 0.00547 **   |
| unknown                                                     | -0.48155    | 0.22383    | -2.151  | 0.03153 *    |
| region (reference: Asia-Pacific)                            |             |            |         |              |
| Europe                                                      | 0.78095     | 0.18548    | 4.210   | 2.63e-05 *** |
| Middle East and Africa                                      | 18.63036    | 464.22888  | 0.040   | 0.96799      |
| North America                                               | -0.10731    | 0.23330    | -0.460  | 0.64557      |
| South America                                               | 17.59444    | 3841.58404 | 0.005   | 0.99635      |

**AHSCT (reference) vs. natalizumab**

|                                                             | Coefficient | Std. Error | t      | Pr(> t )     |
|-------------------------------------------------------------|-------------|------------|--------|--------------|
| (Intercept)                                                 | -1.25430    | 0.48612    | -2.580 | 0.009960 **  |
| sex [male]                                                  | 0.01002     | 0.18285    | 0.055  | 0.956294     |
| age                                                         | 0.05171     | 0.01075    | 4.812  | 1.63e-06 *** |
| baseline disability, EDSS                                   | -0.44617    | 0.05062    | -8.814 | < 2e-16 ***  |
| relapses, previous 12 months                                | -0.07155    | 0.16893    | -0.424 | 0.671953     |
| relapses, previous 24 months                                | 0.57310     | 0.13167    | 4.353  | 1.43e-05 *** |
| disease duration                                            | 0.04288     | 0.01578    | 2.718  | 0.006637 **  |
| the most active previous therapy (reference: high-efficacy) |             |            |        |              |
| low-efficacy                                                | 2.79889     | 0.35961    | 7.783  | 1.24e-14 *** |
| medium-efficacy                                             | 2.07821     | 0.40785    | 5.096  | 3.88e-07 *** |
| unknown                                                     | 1.75696     | 0.29889    | 5.878  | 5.01e-09 *** |
| region (reference: Asia-Pacific)                            |             |            |        |              |
| Europe                                                      | 0.09309     | 0.19878    | 0.468  | 0.639609     |
| Middle East and Africa                                      | 17.37428    | 614.86489  | 0.028  | 0.977461     |
| North America                                               | -0.92456    | 0.25547    | -3.619 | 0.000305 *** |
| South America                                               | 16.84731    | 2369.15464 | 0.007  | 0.994327     |

**AHSCT (reference) vs. ocrelizumab**

|                                                             | Coefficient | Std. Error | t       | Pr(> t )     |
|-------------------------------------------------------------|-------------|------------|---------|--------------|
| (Intercept)                                                 | 0.81743     | 0.48919    | 1.671   | 0.0951 .     |
| sex [male]                                                  | -0.09207    | 0.21133    | -0.436  | 0.6632       |
| age                                                         | 0.09447     | 0.01223    | 7.726   | 3.12e-14 *** |
| baseline disability, EDSS                                   | -0.66487    | 0.06560    | -10.136 | < 2e-16 ***  |
| relapses, previous 12 months                                | -0.45783    | 0.19173    | -2.388  | 0.0172 *     |
| relapses, previous 24 months                                | 0.18402     | 0.14820    | 1.242   | 0.2147       |
| disease duration                                            | 0.01249     | 0.01711    | 0.730   | 0.4657       |
| the most active previous therapy (reference: high-efficacy) |             |            |         |              |
| low-efficacy                                                | -0.49302    | 0.36650    | -1.345  | 0.1789       |
| medium-efficacy                                             | 0.68632     | 0.37390    | 1.836   | 0.0668 .     |
| unknown                                                     | -1.12312    | 0.26533    | -4.233  | 2.56e-05 *** |
| region (reference: Asia-Pacific)                            |             |            |         |              |
| Europe                                                      | -1.00692    | 0.22014    | -4.574  | 5.49e-06 *** |
| Middle East and Africa                                      | 18.13326    | 553.43475  | 0.033   | 0.9739       |
| North America                                               | -1.25794    | 0.29350    | -4.286  | 2.03e-05 *** |

**eTable 6**  
**Power analysis**

|                                                                     | <b>AHSCT vs.<br/>fingolimod</b> | <b>AHSCT vs.<br/>natalizumab</b> | <b>AHSCT vs.<br/>ocrelizumab</b> |
|---------------------------------------------------------------------|---------------------------------|----------------------------------|----------------------------------|
| <b>Annualised relapse rate</b>                                      | -                               | -                                | 0.17                             |
| <b>Relapse</b><br>(difference in cumulative hazards)                | -                               | -                                | 62%                              |
| <b>Disability worsening</b><br>(difference in cumulative hazards)   | 50%                             | 19%                              | 69%                              |
| <b>Disability improvement</b> (difference<br>in cumulative hazards) | -                               | -                                | 54%                              |

The table presents minimum detectable differences between the compared groups, estimated with 200 simulations per comparison and outcome at  $\alpha=0.05$  and  $1-\beta=0.80$ . The power estimates were only calculated for analyses that did not find evidence of difference between groups.



**eTable 7**  
**Serious adverse events reported after AHST**

| <b>serious adverse event</b>      | <b>number of events</b> |
|-----------------------------------|-------------------------|
| <b>Infections</b>                 |                         |
| Epstein-Barr virus                | 11                      |
| cytomegalovirus                   | 11                      |
| herpes simplex or zoster          | 8                       |
| influenza                         | 2                       |
| other viral infection             | 2                       |
| Bacterial infection               | 6                       |
| upper respiratory tract infection | 3                       |
| lower respiratory tract infection | 2                       |
| urinary tract infection           | 2                       |
| sepsis                            | 2                       |
| <b>Haematological</b>             |                         |
| thrombosis                        | 3                       |
| thrombocytopenia                  | 2                       |
| <b>Gastrointestinal</b>           |                         |
| liver toxicity                    | 1                       |
| colitis                           | 1                       |
| Mallory-Weiss syndrome            | 1                       |
| <b>Endocrinological</b>           |                         |
| hypothyroidism                    | 1                       |
| ovarian failure                   | 1                       |
| Fever of unknown aetiology        | 2                       |
| Lymphadenopathy                   | 1                       |
| Arthralgia                        | 1                       |
| Acute kidney injury               | 1                       |
| Atrial fibrillation               | 1                       |
| Other                             | 13                      |
