# Supplementary material
Source: PubMed Central journal article supplement (PMC10186210)
Supplement: jamaneurol-e231184-s003.pdf [file jamaneurol-e231184-s003.pdf]

\*First name, last name, and suffix (if applicable) are required and will appear in PubMed.

| <b>*Group Name(s): MS Base Study Group Collaborators</b> |                   |                              |                  |                                                                                                                                                      |                                          |                                                         |                                                                                            |
|----------------------------------------------------------|-------------------|------------------------------|------------------|------------------------------------------------------------------------------------------------------------------------------------------------------|------------------------------------------|---------------------------------------------------------|--------------------------------------------------------------------------------------------|
| <b>*First Name and Middle Initial(s)</b>                 | <b>*Last Name</b> | <b>*Suffix (eg, Jr, III)</b> | Academic Degrees | Institution                                                                                                                                          | Location (city, state/province, country) | Role or Contribution, eg, chair, principal investigator | Group (if more than 1 Group listed in the byline) and/or Subgroup (eg, Steering Committee) |
| Dana                                                     | Horakova          |                              | MD, PhD          | Department of Neurology and Center of Clinical Neuroscience, First Faculty of Medicine, Charles University in Prague and General University Hospital | Prague, Czech Republic                   | investigator, data contributor                          | MSBase collaborators                                                                       |
| Katherine                                                | Buzzard           |                              | MBBS, PhD        | Department of Neurology Box Hill Hospital, Monash University, MS Centre Royal Melbourne Hospital                                                     | Melbourne, Australia                     | investigator, data contributor                          | MSBase collaborators                                                                       |
| Murat                                                    | Terzi             |                              | MD               | From Medical Faculty 19 Mayis University                                                                                                             | Samsun, Turkey                           | investigator, data contributor                          | MSBase collaborators                                                                       |
| Alexandre                                                | Prat              |                              | MD, PhD          | From CHUM MS Center and Universite de Montreal                                                                                                       | Canada                                   | investigator, data contributor                          | MSBase collaborators                                                                       |
| Marc                                                     | Girard            |                              | MD               | From CHUM MS Center and Universite de Montreal                                                                                                       | Canada                                   | investigator, data contributor                          | MSBase collaborators                                                                       |
| Pierre                                                   | Grammond          |                              | MD               | From CISSS Chaudière-Appalache                                                                                                                       | Canada                                   | investigator, data contributor                          | MSBase collaborators                                                                       |
| Michael                                                  | Barnett           |                              | MBBS, PhD        | Brain and Mind Centre, University of Sydney, Department of Neurology Royal Prince Alfred Hospital,                                                   | Sydney, Australia                        | investigator, data contributor                          | MSBase collaborators                                                                       |
| Grace                                                    | Stewart           |                              | MD               | Brain and Mind Centre, University of Sydney, Department of Neurology Royal Prince Alfred Hospital,                                                   | Sydney, Australia                        | investigator, data contributor                          | MSBase collaborators                                                                       |
| Marco                                                    | Onofrj            |                              | MD               | Department of Neuroscience, Imaging and Clinical sciences, University G. d'Annunzio                                                                  | Chieti, Italy                            | investigator, data contributor                          | MSBase collaborators                                                                       |

## Supplemental Online Content: Nonauthor Collaborators

\*First name, last name, and suffix (if applicable) are required and will appear in PubMed.

| *First Name and Middle Initial(s) | *Last Name     | *Suffix (eg, Jr, III) | Academic Degrees | Institution                                                                        | Location (city, state/province, country) | Role or Contribution, eg, chair, principal investigator | Group (if more than 1 Group listed in the byline) and/or Subgroup (eg, Steering Committee) |
|-----------------------------------|----------------|-----------------------|------------------|------------------------------------------------------------------------------------|------------------------------------------|---------------------------------------------------------|--------------------------------------------------------------------------------------------|
| Guillermo                         | Izquierdo      |                       | MD               | Hospital Universitario Virgen Macarena                                             | Sevilla, Spain                           | investigator, data contributor                          | MSBase collaborators                                                                       |
| Sara                              | Eichau         |                       | MD               | Hospital Universitario Virgen Macarena                                             | Sevilla, Spain                           | investigator, data contributor                          | MSBase collaborators                                                                       |
| Francois                          | Grand'Maison   |                       | MD               | Neuro Rive-Sud                                                                     | Quebec, Canada                           | investigator, data contributor                          | MSBase collaborators                                                                       |
| Julie                             | Prevost        |                       | MD               | CSSS Saint-Jérôme                                                                  | Saint-Jérôme, Canada                     | investigator, data contributor                          | MSBase collaborators                                                                       |
| Bart                              | Van Wijmeersch |                       | MD, PhD          | Rehabilitation and MS-Centre Overpelt and Hasselt University                       | Hasselt, Belgium                         | investigator, data contributor                          | MSBase collaborators                                                                       |
| Maria Pia                         | Amato          |                       | MD               | Department NEUROFARBA, University of Florence                                      | Florence, Italy                          | investigator, data contributor                          | MSBase collaborators                                                                       |
| Vahid                             | Shaygannejad   |                       | MD               | Isfahan University of Medical Sciences                                             | Isfahan, Iran                            | investigator, data contributor                          | MSBase collaborators                                                                       |
| Cavit                             | Boz            |                       | MD               | KTU Medical Faculty Farabi Hospital                                                | Trabzon, Turkey                          | investigator, data contributor                          | MSBase collaborators                                                                       |
| Ricardo Fernandez                 | Bolaños        |                       | MD               | Hospital Universitario Virgen de Valme                                             | Seville, Spain                           | investigator, data contributor                          | MSBase collaborators                                                                       |
| Aysun                             | Soysal         |                       | MD               | Bakirkoy Education and Research Hospital for Psychiatric and Neurological Diseases | Istanbul, Turkey                         | investigator, data contributor                          | MSBase collaborators                                                                       |
| Cristina                          | Ramo-Tello     |                       | MD               | Hospital Germans Trias i Pujol                                                     | Badalona, Spain                          | investigator, data contributor                          | MSBase collaborators                                                                       |
| Claudio                           | Solaro         |                       | MD               | Department of Neurology ASL3 Genovese                                              | Genova, Italy                            | investigator, data contributor                          | MSBase collaborators                                                                       |
| Claudio                           | Gobbi          |                       | MD               | Ospedale Civico Lugano                                                             | Lugano, Switzerland                      | investigator, data contributor                          | MSBase collaborators                                                                       |
| Jose Antonio                      | Cabrera-Gomez  |                       | MD               | Centro Internacional de Restauracion Neurologica                                   | Havana, Cuba                             | investigator, data contributor                          | MSBase collaborators                                                                       |
| Etienne                           | Roulet         |                       | MD               | MS Clinic Hopital Tenon                                                            | Paris, France                            | investigator, data contributor                          | MSBase collaborators                                                                       |

## Supplemental Online Content: Nonauthor Collaborators

\*First name, last name, and suffix (if applicable) are required and will appear in PubMed.

| *First Name and Middle Initial(s) | *Last Name          | *Suffix (eg, Jr, III) | Academic Degrees | Institution                                           | Location (city, state/province, country) | Role or Contribution, eg, chair, principal investigator | Group (if more than 1 Group listed in the byline) and/or Subgroup (eg, Steering Committee) |
|-----------------------------------|---------------------|-----------------------|------------------|-------------------------------------------------------|------------------------------------------|---------------------------------------------------------|--------------------------------------------------------------------------------------------|
| Cees                              | Zwanikken           |                       | MD               | University Hospital Nijmegen,                         | Nijmegen, Netherlands                    | investigator, data contributor                          | MSBase collaborators                                                                       |
| Leontien                          | Den braber-Moerland |                       | MD               | Franciscus Ziekenhuis                                 | Roosendaal, Netherlands                  | investigator, data contributor                          | MSBase collaborators                                                                       |
| Norma                             | Deri                |                       | MD               | Hospital Fernandez                                    | Capital Federal, Argentina               | investigator, data contributor                          | MSBase collaborators                                                                       |
| Maria Laura                       | Saladino            |                       | MD               | INEBA - Institute of Neuroscience Buenos Aires        | Buenos Aires, Argentina                  | investigator, data contributor                          | MSBase collaborators                                                                       |
| Edgardo                           | Cristiano           |                       | MD               | Centro de Esclerosis Múltiple de Buenos Aires (CEMBA) | Buenos Aires, Argentina                  | investigator, data contributor                          | MSBase collaborators                                                                       |
| Juan Ignacio                      | Rojas               |                       | MD               | Centro de Esclerosis Múltiple de Buenos Aires (CEMBA) | Buenos Aires, Argentina                  | investigator, data contributor                          | MSBase collaborators                                                                       |
| Carlos                            | Vrech               |                       | MD               | Sanatorio Allende                                     | Cordoba, Argentina                       | investigator, data contributor                          | MSBase collaborators                                                                       |
| Cameron                           | Shaw                |                       | MBBS, PhD        | Geelong Hospital                                      | Australia                                | investigator, data contributor                          | MSBase collaborators                                                                       |
| Neil                              | Shuey               |                       | MBBS, PhD        | St Vincents Hospital                                  | Melbourne, Australia                     | investigator, data contributor                          | MSBase collaborators                                                                       |
| Mike                              | Boggild             |                       | MBBS, PhD        | Townsville Hospital                                   | Townsville, Australia                    | investigator, data contributor                          | MSBase collaborators                                                                       |
| Ik Lin                            | Tan                 |                       | MD               | Macquarie University Hospital                         | Sydney, Australia                        | investigator, data contributor                          | MSBase collaborators                                                                       |
| Todd                              | Hardy               |                       | MD               | Concord Repatriation General Hospital                 | Sydney, Australia                        | investigator, data contributor                          | MSBase collaborators                                                                       |
| Danny                             | Decoo               |                       | MD               | AZ Alma Ziekenhuis                                    | Sijsele - Damme, Bergium                 | investigator, data contributor                          | MSBase collaborators                                                                       |
| Fraser                            | Moore               |                       | MD               | Jewish General Hospital                               | Montreal, Canada                         | investigator, data contributor                          | MSBase collaborators                                                                       |
| Jiwon                             | Oh                  |                       | MD               | St. Michael's Hospital                                | Toronto, Canada                          | investigator, data contributor                          | MSBase collaborators                                                                       |

## Supplemental Online Content: Nonauthor Collaborators

\*First name, last name, and suffix (if applicable) are required and will appear in PubMed.

| *First Name and Middle Initial(s) | *Last Name    | *Suffix (eg, Jr, III) | Academic Degrees | Institution                                | Location (city, state/province, country) | Role or Contribution, eg, chair, principal investigator | Group (if more than 1 Group listed in the byline) and/or Subgroup (eg, Steering Committee) |
|-----------------------------------|---------------|-----------------------|------------------|--------------------------------------------|------------------------------------------|---------------------------------------------------------|--------------------------------------------------------------------------------------------|
| Patrice                           | Lalive        |                       | MD               | Geneva University Hospital                 | Geneva, Switzerland                      | investigator, data contributor                          | MSBase collaborators                                                                       |
| Radek                             | Ampapa        |                       | MD               | Nemocnice Jihlava                          | Jihlava, Czech Republic                  | investigator, data contributor                          | MSBase collaborators                                                                       |
| Thor                              | Petersen      |                       | MD               | Aarhus University Hospital                 | Arhus C, Denmark                         | investigator, data contributor                          | MSBase collaborators                                                                       |
| Celia                             | Oreja-Guevara |                       | MD               | Hospital Clinico San Carlos                | Madrid, Spain                            | investigator, data contributor                          | MSBase collaborators                                                                       |
| Angel                             | Perez Sempere |                       | MD               | Hospital General Universitario de Alicante | Alicante, Spain                          | investigator, data contributor                          | MSBase collaborators                                                                       |
| Jose Andres                       | Dominguez     |                       | MD               | Hospital Universitario de la Ribera        | Alzira, Spain                            | investigator, data contributor                          | MSBase collaborators                                                                       |
| Sarah                             | Besora        |                       | MD               | Hospital Universitari MútuaTerrassa        | Barcelona, Spain                         | investigator, data contributor                          | MSBase collaborators                                                                       |
| Stella                            | Hughes        |                       | MD               | Royal Victoria Hospital                    | Belfast, United Kingdom                  | investigator, data contributor                          | MSBase collaborators                                                                       |
| Orla                              | Gray          |                       | MD               | South Eastern HSC Trust                    | Belfast, United Kingdom                  | investigator, data contributor                          | MSBase collaborators                                                                       |
| Nikolaos                          | Grigoriadis   |                       | MD               | AHEPA University Hospital                  | Thessaloniki, Greece                     | investigator, data contributor                          | MSBase collaborators                                                                       |
| Imre                              | Piroska       |                       | MD               | Veszprém Megyei Csolnoky Ferenc Kórház zrt | Veszprem, Hungary                        | investigator, data contributor                          | MSBase collaborators                                                                       |
| Csilla                            | Rozsa         |                       | MD               | Jahn Ferenc Teaching Hospital              | Budapest, Hungary                        | investigator, data contributor                          | MSBase collaborators                                                                       |
| Krisztian                         | Kasa          |                       | MD               | Jahn Ferenc Teaching Hospital              | Budapest, Hungary                        | investigator, data contributor                          | MSBase collaborators                                                                       |
| Magdolna                          | Simo          |                       | MD               | Semmelweis University Budapest             | Budapest, Hungary                        | investigator, data contributor                          | MSBase collaborators                                                                       |
| Krisztina                         | Kovacs        |                       | MD               | Péterfy Sandor Hospital                    | Budapest, Hungary                        | investigator, data contributor                          | MSBase collaborators                                                                       |

## Supplemental Online Content: Nonauthor Collaborators

\*First name, last name, and suffix (if applicable) are required and will appear in PubMed.

| *First Name and Middle Initial(s) | *Last Name | *Suffix (eg, Jr, III) | Academic Degrees | Institution                                       | Location (city, state/province, country) | Role or Contribution, eg, chair, principal investigator | Group (if more than 1 Group listed in the byline) and/or Subgroup (eg, Steering Committee) |
|-----------------------------------|------------|-----------------------|------------------|---------------------------------------------------|------------------------------------------|---------------------------------------------------------|--------------------------------------------------------------------------------------------|
| Attila                            | Sas        |                       | MD               | BAZ County Hospital                               | Miskolc, Hungary                         | investigator, data contributor                          | MSBase collaborators                                                                       |
| Eniko                             | Dobos      |                       | MD               | Szent Imre Hospital                               | Budapest, Hungary                        | investigator, data contributor                          | MSBase collaborators                                                                       |
| Cecilia                           | Rajda      |                       | MD               | University of Szeged                              | Szeged, Hungary                          | investigator, data contributor                          | MSBase collaborators                                                                       |
| Chris                             | McGuigan   |                       | MD               | St Vincent's University Hospital                  | Dublin, Ireland                          | investigator, data contributor                          | MSBase collaborators                                                                       |
| Deborah                           | Mason      |                       | MD               | Christchurch Hospital                             | Christchurch, New Zealand                | investigator, data contributor                          | MSBase collaborators                                                                       |
| Jan                               | Schepel    |                       | MD               | Waikato Hospital                                  | Hamilton, New Zealand                    | investigator, data contributor                          | MSBase collaborators                                                                       |
| Jabir                             | Alkhaboori |                       | MD               | Royal Hospital                                    | Muscat, Oman                             | investigator, data contributor                          | MSBase collaborators                                                                       |
| Maria Edite                       | Rio        |                       | MD               | Centro Hospitalar Universitario de Sao Joao       | Porto, Portugal                          | investigator, data contributor                          | MSBase collaborators                                                                       |
| Simu                              | Mihaela    |                       | MD               | Emergency Clinical County Hospital "Pius Brinzeu" | Timisoara, Romania                       | investigator, data contributor                          | MSBase collaborators                                                                       |
| Talal                             | Al-Harbi   |                       | MD               | King Fahad Specialist Hospital-Dammam             | Khobar, Saudi Arabia                     | investigator, data contributor                          | MSBase collaborators                                                                       |
| Ayse                              | Altintas   |                       | MD               | Koc University                                    | Istanbul, Turkey                         | investigator, data contributor                          | MSBase collaborators                                                                       |
| Ilya                              | Kister     |                       | MD               | New York University Langone Medical Center        | New York, Unites States                  | investigator, data contributor                          | MSBase collaborators                                                                       |
| Mark                              | Marriott   |                       | MD               | Royal Melbourne Hospital                          | Melbourne, Australia                     | investigator, data contributor                          | MSBase collaborators                                                                       |
| Trevor                            | Kilpatrick |                       | MBBS, PhD, FRACP | Royal Melbourne Hospital                          | Melbourne, Australia                     | investigator, data contributor                          | MSBase collaborators                                                                       |

## Supplemental Online Content: Nonauthor Collaborators

\*First name, last name, and suffix (if applicable) are required and will appear in PubMed.

| *First Name and Middle Initial(s) | *Last Name  | *Suffix (eg, Jr, III) | Academic Degrees | Institution                                    | Location (city, state/province, country) | Role or Contribution, eg, chair, principal investigator | Group (if more than 1 Group listed in the byline) and/or Subgroup (eg, Steering Committee) |
|-----------------------------------|-------------|-----------------------|------------------|------------------------------------------------|------------------------------------------|---------------------------------------------------------|--------------------------------------------------------------------------------------------|
| John                              | King        |                       | MBBS, MD, FRACP  | Royal Melbourne Hospital                       | Melbourne, Australia                     | investigator, data contributor                          | MSBase collaborators                                                                       |
| Ai-Lan                            | Nguyen      |                       | MD               | Royal Melbourne Hospital                       | Melbourne, Australia                     | investigator, data contributor                          | MSBase collaborators                                                                       |
| Chris                             | Dwyer       |                       | MD               | Royal Melbourne Hospital                       | Melbourne, Australia                     | investigator, data contributor                          | MSBase collaborators                                                                       |
| Mastura                           | Monif       |                       | MD               | Royal Melbourne Hospital                       | Melbourne, Australia                     | investigator, data contributor                          | MSBase collaborators                                                                       |
| Izanne                            | Roos        |                       | MD               | Royal Melbourne Hospital                       | Melbourne, Australia                     | investigator, data contributor                          | MSBase collaborators                                                                       |
| Lisa                              | Taylor      |                       | MD               | Royal Melbourne Hospital                       | Melbourne, Australia                     | investigator, data contributor                          | MSBase collaborators                                                                       |
| Matteo                            | Diamanti    |                       | MD               | Azienda Sanitaria Unica Regionale Marche - AV3 | Macerata, Italy                          | investigator, data contributor                          | MSBase collaborators                                                                       |
| Clara                             | Chisari     |                       | MD               | GF Ingrassia                                   | Catania, Italy                           | investigator, data contributor                          | MSBase collaborators                                                                       |
| Simona                            | Toscano     |                       | MD               | GF Ingrassia                                   | Catania, Italy                           | investigator, data contributor                          | MSBase collaborators                                                                       |
| Lo Fermo                          | Salvatore   |                       | MD               | GF Ingrassia                                   | Catania, Italy                           | investigator, data contributor                          | MSBase collaborators                                                                       |
| Catherine                         | Larochelle  |                       | MD               | CHUM MS Center and Universite de Montreal      | Montreal, Canada                         | investigator, data contributor                          | MSBase collaborators                                                                       |
| Giovanna                          | De Luca     |                       | MD               | University G. d'Annunzio                       | Chieti, Italy                            | investigator, data contributor                          | MSBase collaborators                                                                       |
| Valeria                           | Di Tommaso  |                       | MD               | University G. d'Annunzio                       | Chieti, Italy                            | investigator, data contributor                          | MSBase collaborators                                                                       |
| Daniela                           | Travaglini  |                       | MD               | University G. d'Annunzio                       | Chieti, Italy                            | investigator, data contributor                          | MSBase collaborators                                                                       |
| Erika                             | Pietrolongo |                       | MD               | University G. d'Annunzio                       | Chieti, Italy                            | investigator, data contributor                          | MSBase collaborators                                                                       |

## Supplemental Online Content: Nonauthor Collaborators

\*First name, last name, and suffix (if applicable) are required and will appear in PubMed.

| *First Name and Middle Initial(s) | *Last Name    | *Suffix (eg, Jr, III) | Academic Degrees | Institution                     | Location (city, state/province, country) | Role or Contribution, eg, chair, principal investigator | Group (if more than 1 Group listed in the byline) and/or Subgroup (eg, Steering Committee) |
|-----------------------------------|---------------|-----------------------|------------------|---------------------------------|------------------------------------------|---------------------------------------------------------|--------------------------------------------------------------------------------------------|
| Maria                             | di Iorio      |                       | MD               | University G. d'Annunzio        | Chieti, Italy                            | investigator, data contributor                          | MSBase collaborators                                                                       |
| Deborah                           | Farina        |                       | MD               | University G. d'Annunzio        | Chieti, Italy                            | investigator, data contributor                          | MSBase collaborators                                                                       |
| Luca                              | Mancinelli    |                       | MD               | University G. d'Annunzio        | Chieti, Italy                            | investigator, data contributor                          | MSBase collaborators                                                                       |
| Raymond                           | Hupperts      |                       | MD               | Zuyderland Medical Center       | Sittard-Geleen, Netherlands              | investigator, data contributor                          | MSBase collaborators                                                                       |
| Javier                            | Olascoaga     |                       | MD               | Hospital Universitario Donostia | San Sebastián, Spain                     | investigator, data contributor                          | MSBase collaborators                                                                       |
| Albert                            | Saiz          |                       | MD               | Hospital Clinic de Barcelona    | Barcelona, Spain                         | investigator, data contributor                          | MSBase collaborators                                                                       |
| Robert                            | Zivadinov     |                       | MD               | Buffalo General Medical Center  | Buffalo, United States                   | investigator, data contributor                          | MSBase collaborators                                                                       |
| Ralph                             | Benedict      |                       | MD               | Buffalo General Medical Center  | Buffalo, United States                   | investigator, data contributor                          | MSBase collaborators                                                                       |
| Freek                             | Verheul       |                       | MD               | Groene Hart Ziekenhuis          | Gouda, Netherlands                       | investigator, data contributor                          | MSBase collaborators                                                                       |
| Marzena                           | Fabis-Pedrini |                       | PhD              | University of Western Australia | Nedlands, Australia                      | investigator, data contributor                          | MSBase collaborators                                                                       |
