# Supplementary material
Source: PubMed Central journal article supplement (PMC10186210)
Supplement: jamaneurol-e231184-s004.pdf [file jamaneurol-e231184-s004.pdf]

## Data Sharing Statement

Kalincik. Comparative Effectiveness of Autologous Hematopoietic Stem Cell Transplantation vs Fingolimod, Natalizumab, and Ocrelizumab in Highly Active Relapsing-Remitting Multiple Sclerosis. *JAMA Neurol*. Published May 15, 2023. doi:10.1001/jamaneurol.2023.1184

### Data

**Data available:** No

### Additional Information

**Explanation for why data not available:** Data from the participating cohorts can be requested from the principal investigators, conditional after obtaining approvals from the appropriate institutional review boards. The MSBase registry is a data processor and warehouses data from individual principal investigators who agree to share their datasets on a project-by-project basis. Data access to external parties can be granted on reasonable request at the sole discretion of the principal investigators, who will need to be approached individually for permission.
